# Supplementary material for: Biphasic human insulin 30 thrice daily, is it reasonable?
Source: BMC Res Notes. 2020 May 24;13:250. doi: 10.1186/s13104-020-05090-6 (PMC7247174; doi:10.1186/s13104-020-05090-6)
Supplement: Supplementary file 1 — Additional file 1. Raw data sheet. [file 13104_2020_5090_MOESM1_ESM.xlsx]

## Sheet: Sheet1
Ptn. No.	Demographic and Administrative Information									Disease Condition										Past Surgical History						Family and Social History						Life Style (Diet, Exercise, Smoking)							Insulin 1
																																							Total Dose 1					Freq. 1	Amt. Wk. 0			Amt. mo. 1
	Ptn. Name	Ptn. ID	Ph. No.	Age	Gender	Mrt. St.	Edc. Lvl.	Occp.	Allergy	HTN	DM	IHD	DysLip.	HF	Hyr. Thyr.	Hyo.Thyr.	Rnl. Imp.	Hep. Imp.	Others	Chlctmy	Thyrctmy	CABG	HVR	Car. Cath.	Others	DM	HTN	IHD	Thyroid	Asthma	Others	Ques. 1	Ques. 2	Ques. 3	Ques. 4	Ques. 5	Ques. 6	Ques. 7	Wk. 0	mo. 1	mo. 2	mo. 3	Wk. 12		Mrn.	Evn.	Nt.	Mrn.	Evn.
1			1	55	2	2	3	2	0	1	1	2	1	2	2	1	2	2	2	2	2	2	2	2	2	1	1	2	1	2	2	7	7	1	0	1	0	0	65	80	70	60		3	30	11	27	35	15
2			2	54	2	2	4	2	0	2	1	2	2	2	2	2	2	2	2	2	2	2	2	2	2	2	1	2	2	2	2	7	7	1	4	1	0	0	70	70	65	70		2	40	0	30	40	0
3			3	55	2	2	3	1	0	1	1	1	1	2	2	2	2	2	2	2	2	2	2	1	1	2	1	1	2	2	2	7	7	2	2	1	0	0	48	48	45	50		2	30	0	18	30	0
4			4	53	2	2	3	2	0	1	1	2	1	2	2	2	2	2	2	2	2	2	2	2	1	2	2	2	2	2	2	7	7	1	3	1	0	0	78	90	90	92		3	26	26	26	30	30
5			5	61	2	2	4	1	0	1	1	2	1	2	2	2	2	2	1	2	2	2	2	1	2	1	1	2	2	2	2	7	7	1	5	1	0	0	63	63	72	60		3	21	21	21	21	21
6			6	54	2	2	1	2	0	1	1	1	1	2	2	2	2	2	2	2	2	2	1	2	1	2	2	2	2	2	2	5	7	1	0	1	0	0	185	185	200	123		3	60	60	65	60	60
7			7	60	2	2	4	1	0	2	1	2	1	2	2	2	2	2	2	2	2	2	2	2	1	1	1	2	1	2	2	7	7	1	0	1	0	0	60	60	50	60		2	35	0	25	35	0
8			8	60	2	2			0	1	1	2	2	2	2	2	1	2	2	2	2	2	2	2	1	2	2	2	2	2	2	7	7	1	1	1	0	0	40	40	50	50		2	20	0	20	20	0
9			9	74	1	2		2	0	1	1	2	2	2	2	2	2	2	2	2	2	2	2	1	2	2	2	2	2	2	2	7	7	1	3	1	0	0	115	115				3	40	40	35
10			10	54	2	2		2	0	2	1	2	2	2	2	2	2	2	2	2	2	2	2	2	2	2	2	2	2	2	2	7	7	1	2	1	0	0	65	60	60	60		3	30	20	15	30	20
11			11	67	1	2		1	0	1	1	1	1	2	2	2	2	2	2	1	2	2	2	1	2	2	2	2	2	2	2	7	7	1	3	1	0	0	45	45	45	45		3	15	15	15	15	15
12			12	50	1	2		1	0	1	1	1	1	2	2	2	2	2	2	2	2	2	2	1	2	2	2	2	2	2	2	7	7	1	2	1	0	0	90	100	90	70		2	40	0	50	45	0
13			13	68	2	2		2	0	1	1	2	1	2	2	2	2	2	1	2	2	2	2	1	2	2	2	2	2	2	2	7	7	1	1	1	0	0	75	75	84			3	25	25	25	25	25
14			14	50	1	2		1	0	1	1	2	2	2	2	2	2	2	2	2	2	2	2	1	2	2	2	2	2	2	2	7	7	1	2	1	0	0	65	75	90	95		2	40	0	25	45	0
15			15	65	1	2			0	1	1	1	1	2	2	2	2	2	2	1	1	1	1	2	2	2	2	2	2	2	2	7	7	1	4	1	0	0	75	75	60	60		3	25	25	25	25	25
16			16	33	1	2		1	0	2	1	2	2	2	2	2	2	2	2	2	2	2	2	2	2	2	2	2	2	2	2	7	7	1	7	1	0	0	55	40	55	55		3	20	20	15	15	15
17			17	53	2	2		1	0	1	1	1	1	2	2	2	2	2	2	1	2	2	2	1	2	2	2	2	2	2	2	7	7	1	3	1	0	0	90	90	93	93		3	35	30	25	35	30
18			18	58	2	2		2	0	1	1	2	2	2	2	2	2	2	1	2	2	2	2	2	1	2	2	2	2	2	2	7	7	1	1	1	0	0	90	90	100	110		3	30	30	30	30	30
19			19	51	1	2		2	0	1	1	1	1	2	2	2	2	2	2	2	2	2	2	1	2	2	2	2	2	2	2	7	7	1	7	1	0	0	65	65	70	65		3	30	20	15	30	20
20			20	67	2	2	4		0	1	1	1	1	2	2	1	1	2	1	2	2	2	2	1	2	2	2	2	2	2	2	7	7	1	2	1	0	0	35	35	35	45		3	10	10	15	10	10
21			21	38	2	2			0	1	1	1	2	2	2	1	2	2	2	2	2	2	2	1	1	2	2	2	2	2	2	7	7	1	5	1	0	0	210	210	220	255		3	70	70	70	70	70
22			22	32	2	1	4	1	0	2	1	2	2	2	2	2	2	2	1	2	2	2	2	2	2	2	2	2	2	2	2	7	6	1	7	1	0	0	40	40	42	42		2	20	0	20	20	0
23
24
25
26
27
28
29
30
31
32
33
34
35
36
37
38
39
40
41
42
43
44
45
46
47
48
49
50
51
52
53
54
55
56
57
58
59
60
61
62
63
64
65
66
67
68
69
70
71
72
73
74
75
76
77
78
79
80
81
82
83
84
85
86
87
88
89
90
91
92
93
94
95
96
97
98
99
100
[truncated: 106 more columns]
